# Supplementary material
Source: PubMed Central journal article supplement (PMC8546448)
Supplement: ofa-0014-0520-s01.pdf [file ofa-0014-0520-s01.pdf]

Table S1. Clinical characteristics of participants included and those not included

| Variables                                  | Women included in the analysis | Women not included in the analysis | P value |
|--------------------------------------------|--------------------------------|------------------------------------|---------|
| N                                          | 14348                          | 7954                               |         |
| Age, year                                  | 28.5±2.9                       | 28.6±3.0                           | 0.042*  |
| Gestational age, week                      | 10.4±2.3                       | 10.5±2.7                           | 0.035*  |
| Height, cm                                 | 163.2±4.7                      | 163.1±4.7                          | 0.130*  |
| Parity >1                                  | 544(3.8%)                      | 362(4.6%)                          | 0.006** |
| Han-nationality                            | 13668(95.3%)                   | 7634(96.0%)                        | 0.136** |
| Education>12 years                         | 11795(82.2%)                   | 8546(82.3%)                        | 0.427** |
| DBP, mmHg                                  | 68.4±7.8                       | 68.4±7.8                           | 0.107*  |
| SBP, mmHg                                  | 105.5±10.7                     | 105.7±10.6                         | 0.105*  |
| Pre-pregnancy BMI, kg/m <sup>2</sup>       | 22.4±3.5                       | 22.4±3.5                           | 0.662*  |
| Pre-pregnancy BMI group, kg/m <sup>2</sup> |                                |                                    | 0.513** |
| <18.5                                      | 1351(9.4%)                     | 787(9.9%)                          |         |
| ≥18.5–<24.0                                | 9095(63.4%)                    | 5045(63.5%)                        |         |
| ≥24.0 –<28.0                               | 2903(20.2%)                    | 1558(19.6%)                        |         |
| ≥28.0                                      | 999(7.0%)                      | 557(7.0%)                          |         |
| GDM                                        | 1005(7.0%)                     | 534(8.1%)                          | 0.093** |
| Infant male gender                         | 7458(52.0%)                    | 3621(52.4%)                        | 0.290** |
| Alcohol drinker during pregnancy           | 845(5.9%)                      | 359(4.5%)                          | 0.095** |

Abbreviations: BMI, body mass index; GDM, gestational diabetes mellitus; GCT, glucose challenge test; SBP/DBP, systolic /diastolic blood pressure; LGA, large for gestational age.

\*Derived from Student's t-test.

\*\*Derived from Chi-square Test or Fisher's Exact Test.

Table S2. Odds ratio of subgroup analysis of additive interaction of passive smoking for macrosomia with overweight and obesity status

|                                                    | Model 1          | Model 2          | Model 3         | Model4          |
|----------------------------------------------------|------------------|------------------|-----------------|-----------------|
| <b>Between overweight and passive smoking</b>      |                  |                  |                 |                 |
| BMI<24 kg/m <sup>2</sup> & non-passive smoking     | 1.00             | 1.00             | 1.00            | 1.00            |
| BMI<24 kg/m <sup>2</sup> & passive smoking         | 1.01(0.87-1.18)  | 1.06(0.91-1.24)  | 1.05(0.89-1.23) | 1.05(0.90-1.24) |
| BMI≥24-<28 kg/m <sup>2</sup> & non-passive smoking | 1.91(1.56-2.36)  | 2.02(1.63-2.50)  | 1.91(1.54-2.37) | 1.90(1.53-2.36) |
| BM≥24-<28 kg/m <sup>2</sup> & passive smoking      | 2.40(2.02 -2.89) | 2.45(2.04 -2.94) | 2.30(1.91-2.77) | 2.31(1.91-2.78) |
| <b>Between obesity and passive smoking</b>         |                  |                  |                 |                 |
| BMI<24 kg/m <sup>2</sup> & non-passive smoking     | 1.00             | 1.00             | 1.00            | 1.00            |
| BMI<24 kg/m <sup>2</sup> & passive smoking         | 1.01(0.87-1.18)  | 1.05(0.90-1.23)  | 1.05(0.90-1.23) | 1.05(0.90-1.23) |
| BMI≥28 kg/m <sup>2</sup> & non-passive smoking     | 2.55(1.88-3.46)  | 2.54(1.84-3.51)  | 2.44(1.75-3.40) | 2.37(1.70-3.30) |
| BMI≥28 kg/m <sup>2</sup> & passive smoking         | 3.19(2.53-4.00)  | 3.56(2.78-4.54)  | 3.20(2.49-4.12) | 3.12(2.42-4.02) |

Abbreviations: BMI, body mass index (kg/m<sup>2</sup>)

Model 1: Univariable analysis.

Model 2: Multivariable analysis, adjusted for age, height, parity, education>12years, gestational age at delivery (only for macrosomia), gender (only for macrosomia), weight gain from pre-pregnancy to GCT, insulin treatment, alcohol drinker during pregnancy, multiple pregnancies, systolic blood pressure at first antenatal care visit

Model 3: Further adjusted for GDM, in addition to the variables listed in Model 2.

Model 4: Further adjusted for GCT value, in addition to the variables listed in Model 2.

Table S3. Additive interactions between passive smoking and pre-pregnancy overweight and between passive smoking and pre-pregnancy obesity for macrosomia

|                                        | RERI (95%CI)     | AP (95%CI)       | S (95%CI)       |
|----------------------------------------|------------------|------------------|-----------------|
| Between overweight and passive smoking |                  |                  |                 |
| Model 1                                | 0.47(0.00-0.95)  | 0.20(0.01-0.38)  | 1.51(0.95-2.40) |
| Model 2                                | 0.47(0.00-0.95)  | 0.20(0.01-0.38)  | 1.51(0.95-2.40) |
| Model 3                                | 0.47(0.00-0.95)  | 0.20(0.01-0.38)  | 1.51(0.95-2.40) |
| Model 4                                | 0.47(0.00-0.95)  | 0.20(0.01-0.38)  | 1.51(0.95-2.40) |
| Between obesity and passive smoking    |                  |                  |                 |
| Model 1                                | 0.62(-0.34-1.59) | 0.20(-0.09-0.48) | 1.40(0.80-2.44) |
| Model 2                                | 0.62(-0.34-1.59) | 0.20(-0.09-0.48) | 1.40(0.80-2.44) |
| Model 3                                | 0.62(-0.34-1.59) | 0.20(-0.09-0.48) | 1.40(0.80-2.44) |
| Model 4                                | 0.62(-0.34-1.59) | 0.20(-0.09-0.48) | 1.40(0.80-2.44) |

Abbreviations: BMI, body mass index ( $\text{kg}/\text{m}^2$ ) RERI, relative excess risk due to interaction (RERI); AP, attributable proportion due to interaction and S, synergy index. RERI > 0, AP > 0, or S > 1 suggest significant additive interaction.

Model 1: Univariable analysis.

Model 2: Multivariable analysis, adjusted for age, height, parity, education > 12 years, gestational age at delivery (only for macrosomia), gender (only for macrosomia), weight gain from pre-pregnancy to GCT, insulin treatment, alcohol drinker during pregnancy, multiple pregnancies, systolic blood pressure at first antenatal care visit

Model 3: Further adjusted for GDM, in addition to the variables listed in Model 2.

Model 4: Further adjusted for GCT value, in addition to the variables listed in Model 2.

Table S4. Additive interaction between pre-pregnancy overweight/obesity and passive smoking for macrosomia after adjusting for underweight

|                                                | Model 1          | Model 2         | Model 3          | Model4           |
|------------------------------------------------|------------------|-----------------|------------------|------------------|
| Additive interaction models                    |                  |                 |                  |                  |
| BMI<24 kg/m <sup>2</sup> & non-passive smoking | 1.00             | 1.00            | 1.00             | 1.00             |
| BMI<24 kg/m <sup>2</sup> & passive smoking     | 1.01(0.87-1.18)  | 1.05(0.90-1.23) | 1.05(0.89-1.23)  | 1.05(0.90-1.24)  |
| BMI≥24 kg/m <sup>2</sup> & non-passive smoking | 2.06(1.71-2.48)  | 1.96(1.62-2.39) | 1.88(1.54-2.30)  | 1.86(1.53-2.27)  |
| BMI≥24 kg/m <sup>2</sup> & passive smoking     | 2.61(2.23 -3.06) | 2.49(2.10-2.95) | 2.33(1.96-2.78)  | 2.32(1.95-2.76)  |
| Additive interaction                           |                  |                 |                  |                  |
| RERI (95%CI)                                   | 0.54(0.11-0.97)  | 0.47(0.04-0.90) | 0.40(-0.02-0.82) | 0.40(-0.01-0.82) |
| AP (95%CI)                                     | 0.21(0.05-0.36)  | 0.19(0.03-0.35) | 0.17(0.01-0.34)  | 0.17(0.01-0.34)  |
| S (95%CI)                                      | 1.50(1.03-2.19)  | 1.46(0.99-2.17) | 1.43(0.94-2.19)  | 1.44(0.94-2.20)  |

Abbreviations: BMI, body mass index (kg/m<sup>2</sup>); RERI, relative excess risk due to interaction (RERI); AP, attributable proportion due to interaction and S, synergy index. RERI > 0, AP > 0, or S > 1 suggest significant additive interaction.

Model 1: Univariable analysis.

Model 2: Multivariable analysis, adjusted for age, height, parity, education>12years, gestational age at delivery (only for macrosomia), gender (only for macrosomia), weight gain from pre-pregnancy to GCT, insulin treatment, alcohol drinker during pregnancy, multiple pregnancies, systolic blood pressure at first antenatal care visit, underweight.

Model 3: Further adjusted for GDM, in addition to the variables listed in Model 2.

Model 4: Further adjusted for GCT value, in addition to the variables listed in Model 2.
